# Supplementary material for: Gas-phase fluorescence excitation and emission spectroscopy of mass-selected trapped molecular ions
Source: Royal Society of Chemistry journal article supplement (doi:10.1039/b921076h), 2010-01-01
Supplement: b921076h.pdf [file b921076h.pdf]

## Electronic Supplementary Information

Supplementary Material for PCCP  
This journal is © The Owner Societies 2010

### Gas-phase fluorescence excitation and emission spectroscopy of mass-selected trapped molecular ions

by Qunzhou Bian, Matthew W. Forbes, Francis O. Talbot and Rebecca A. Jockusch\*

Department of Chemistry, University of Toronto, ON Canada

\* Corresponding Author: e-mail: rebecca.jockusch@utoronto.ca

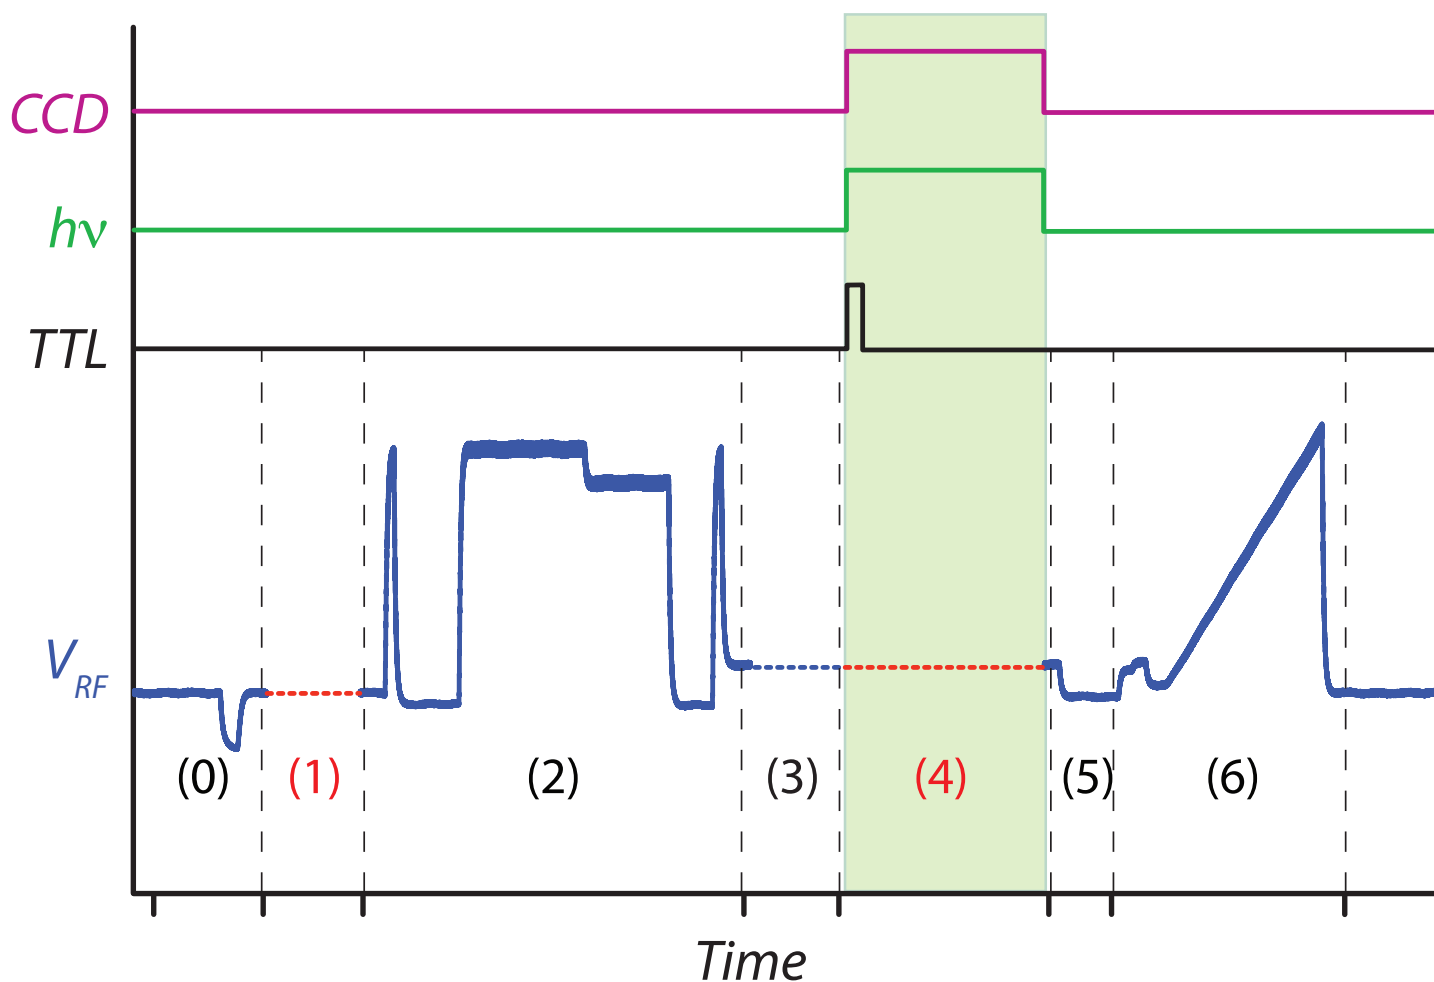

Figure S1. Experimental sequence for fluorescence or photodissociation measurements.  $V_{RF}$  represents the amplitude of the RF waveform applied to the ring electrode, TTL is the master trigger from the Esquire 3000+,  $h\nu$  represents the duration of the laser pulse and the exposure time of the CCD detector. The scan sequence of the QIT is: (0) Clear trap; (1) Ion accumulation (typically 10-100ms); (2) Ion isolation; (3) Cooling delay (?30ms); (4) Ion irradiation (0- 20s); (5) Scan delay (30ms); (6) Mass-selective instability scan. Dotted lines indicate variable event duration.
